# Supplementary material for: ACQ to AIE transformation of quinoline derivatives: modulating substituent electronic effects to alter excited-state reorganization energy distribution
Source: Royal Society of Chemistry journal article supplement (doi:10.1039/d3tc01519j), 2023-01-01
Supplement: d3tc01519j1.pdf [file d3tc01519j1.pdf]

Electronic Supplementary Material (ESI) for Journal of Materials Chemistry C

This journal is © The Royal Society of Chemistry 2023

# Transform Quinoline Derivatives from ACQ to AIE: Modulating Substituent Electronic Effects to Alter Excited State Reorganization Energy Distribution

Longjie Wang,<sup>‡a</sup> Yuchen Zhang,<sup>‡b</sup> Xiangdi Huang,<sup>a</sup> Yanxiong Liu,<sup>a</sup> Yi Cheng,<sup>a</sup> Wenwen Fan,<sup>a</sup> Liyan Zheng,<sup>\*a</sup> and Qiue Cao<sup>\*a</sup>

a. School of Chemical Science and Technology, Key Laboratory of Medicinal Chemistry for Natural Resource, Yunnan University, No. 2 North Cuihu Road

b. Key Laboratory of Organofluorine Chemistry, Shanghai Institute of Organic Chemistry, Chinese Academy of Sciences, 345 Lingling Road, Shanghai 200032, China

<sup>‡</sup> These authors contributed equally to this work.

E-mail: [zhengliyan@ynu.edu.cn](mailto:zhengliyan@ynu.edu.cn) ; [qecao@ynu.edu.cn](mailto:qecao@ynu.edu.cn)

## Materials

All chemicals and reagents are purchased from Aladdin Company. The final products used in all experiments were purified on the silica gel column and recrystallized at least twice.

## Measurement

$^1\text{H}$ ,  $^{13}\text{C}$ -NMR spectra were recorded on AVANCE DRX 400 spectrometer (Bruker, German). HPLC-MS were measured by electrospray ionization mass spectra with a High Performance 1100 Liquid Chromatography-Mass Spectrometer (Agilent Technologies, USA). A C18 column (250 mm\* 4.6 mm, 5  $\mu\text{m}$ , Hypersil GOLD, USA) was deployed as stationary phase. Digital photos were taken with the iPhone XR smartphone. Single-crystal X-ray diffraction (XRD) data were collected on a Rigaku Oxford Diffraction Supernova with Atlas Diffractometer, and crystal structures were solved with Olex2. Fluorescence spectra in the range of 300-700 nm were recorded with the F-4700 fluorescence spectrophotometer (HITACHI, Japan) at room temperature. Fluorescence decay curves measured by 285 nm and 390 nm excitation from Nano LED lamp were obtained on Horiba Jobin Yvon Fluorolog-3 spectrofluorometer. Fluorescence spectra, phosphorescence spectra and fluorescence quantum yields were measured on Horiba Jobin Yvon Fluorolog-3 spectrofluorometer. The size of nanoparticles in the solution was determined by NanoBrook Omni (Bruker, USA).

## Computational Details

All the compounds were fully optimized with the density functional theory (DFT) in gaussian 09 method by using PBE0 density functional and def2svp basis set.<sup>1</sup> The SMD implicit solvation model was used to simulate the effect of solvent molecules on molecular properties through dielectric constant refraction. The reorganization energy was analyzed by Dushin software<sup>2</sup>. The excited state structures of these compounds in crystal environment were simulated by quantum mechanics and molecular mechanics methods (QM/MM) which contained the QM part at PBE0/def2svp level and the MM part with the universal forcefield (UFF) in the Gaussian 09 package. The natural transition orbits of excited electrons were analyzed by Multiwfn and VMD programs.<sup>3</sup>

## Culture and analysis of single crystals

The single crystals of 5-MQB, 5-QPA and 5-MPQ were grown via evaporation of a mixed solvent of ethyl acetate and n-hexane, while the single crystal of 5-QBA was obtained from a solution of dimethylacetamide and diethyl ether. The corresponding Cambridge Crystallographic Data Centre (CCDC) numbers for these crystals are 2255887, 2255889, 2255886, and 2255887, respectively. The Hirshfeld surfaces and decomposed fingerprint plots were calculated and mapped using CrystalExplorer 17.5 package.<sup>4</sup> Single crystal analysis was conducted by olex2 software.<sup>5</sup>

## Compounds Synthesis Method

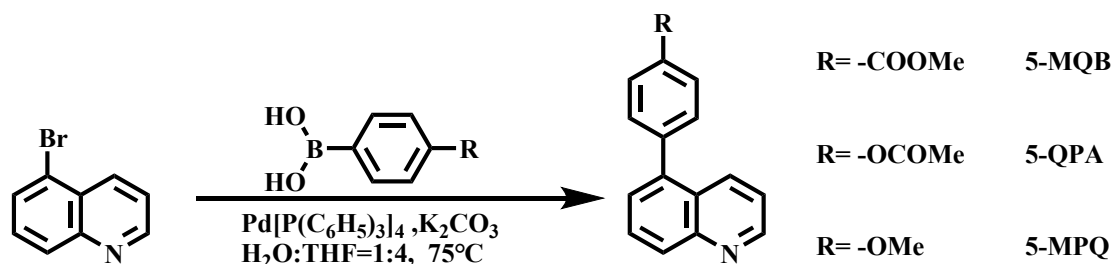

### methyl 4-(quinolin-5-yl)benzoate (5-MQB)

5-bromoquinoline (5.00 mmol, 1.0300 g) and (4-(methoxycarbonyl)phenyl)boronic acid (7.00 mmol, 1.2600 g) were added into a 100.0 mL two-necked flask with 20.0 ml THF, potassium carbonate (0.5000 g, 3.62 mmol) were dissolved in 5.0 mL water and these two solutions were mixed; then, (0.10 mmol, 0.1156 g) (beta-4)-platinum were added into this mixture. After stirring at 75 °C for 48 h under nitrogen gas, the reaction mixture was diluted with water and extracted with ethyl acetate. The organic layer was separated, washed with water and brine, dried with enough anhydrous sodium sulphate. After filtration, the filtrate was evaporated under reduced pressure and the crude product was purified on a silica gel column using petroleum/ether ethyl acetate (10/1, v/v) as eluent. 1.1243 g colorless powder of 5-MQB was obtained with 85.5% yield. <sup>1</sup>H NMR (400 MHz, Chloroform-*d*) δ 8.95 (dd, *J* = 4.2, 1.7 Hz, 1H), 8.18 (dd, *J* = 7.8, 5.9 Hz, 4H), 7.78 (dd, *J* = 8.6, 7.0 Hz, 1H), 7.61 – 7.49 (m, 3H), 7.38 (dd, *J* = 8.6, 4.2 Hz, 1H), 3.98 (s, 3H). <sup>13</sup>C NMR (400 MHz, Chloroform-*d*) δ 168.2, 154.0, 148.5, 144.1, 139.3, 134.9, 130.1, 129.8, 129.6, 129.5, 128.9, 127.3, 126.4, 121.3. HRMS: *m/z*: calculated for C<sub>17</sub>H<sub>13</sub>NO<sub>2</sub>: 263.0946; found: 264.1034 [M+H]<sup>+</sup>.

### 4-(quinolin-5-yl)phenyl acetate (5-QPA)

5-bromoquinoline (5.00 mmol, 1.0300 g) and (4-acetoxyphenyl)boronic acid (7.00 mmol, 1.2600 g) were added into a 100.0 mL two-necked flask with 20.0 ml THF, potassium carbonate (0.5000 g, 3.62 mmol) were dissolved in 5.0 mL water and these two solutions were mixed; then, (0.10 mmol, 0.1156 g) (beta-4)-platinum were added. After stirring at 75 °C for 48 h under nitrogen gas, the reaction mixture was diluted with water and extracted with ethyl acetate. The organic layer was separated, washed with water and brine, dried with enough anhydrous sodium sulphate. After filtration, the filtrate was evaporated under reduced pressure and the crude product was purified on a silica gel column using petroleum/ether ethyl acetate (3/1, v/v) as eluent. 1.0678 g colorless powder of 5-QPA was obtained with 81.2% yield. <sup>1</sup>H NMR (400 MHz, Chloroform-*d*) δ 8.93 (d, *J* = 4.7 Hz, 1H), 8.24 (d, *J* = 8.5 Hz, 1H), 8.14 (d, *J* = 8.4 Hz, 1H), 7.75 (t, *J* = 7.8 Hz, 1H), 7.49 (s, 1H), 7.47 (d, *J* = 7.9 Hz, 2H), 7.36 (dd, *J* = 8.7, 4.0 Hz, 1H), 7.24 (d, *J* = 7.2 Hz, 2H), 2.36 (s, 3H). <sup>13</sup>C NMR (400 MHz, Chloroform-*d*) δ 170.2, 152.3, 148.4, 140.7, 136.5, 134.3, 131.7, 129.1, 129., 127.4, 127.4, 126.6, 121.70, 121.1, 21.2. HRMS: *m/z*: calculated for C<sub>17</sub>H<sub>13</sub>NO<sub>2</sub>: 263.0946; found: 264.1019 [M+H]<sup>+</sup>.

## 5-(4-methoxyphenyl)quinoline (5-MPQ)

5-bromoquinoline (5.00 mmol, 1.0300 g) and (4-ethylphenyl)boronic acid (7.00 mmol, 1.0500 g) were added into a 100.0 mL two-necked flask with 20.0 ml THF, potassium carbonate (0.5000 g, 3.62 mmol) were dissolved in 5.0 mL water and these two solutions were mixed; then, (0.10 mmol, 0.1156 g) (beta-4)-platinum were added. After stirring at 75 °C for 48 h under nitrogen gas, the reaction mixture was diluted with water and extracted with ethyl acetate. The organic layer was separated, washed with water and brine, dried with enough anhydrous sodium sulphate. After filtration, the filtrate was evaporated under reduced pressure and the crude product was purified on a silica gel column using petroleum/ether ethyl acetate (10/1, v/v) as eluent. 1.0579 g colorless powder of QLP-5 was obtained with 90.0% yield. <sup>1</sup>H NMR (400 MHz, Chloroform-*d*) δ(ppm): 8.92 (dd, *J* = 4.2, 1.8 Hz, 1H), 8.28 – 8.26 (m, 1H), 8.12 – 8.10 (m, 1H), 7.74 (dd, *J* = 8.6, 7.1 Hz, 1H), 7.50 – 7.48 (m, 1H), 7.40 – 7.38 (m, 2H), 7.37 – 7.34 (m, 1H), 7.06 – 7.03 (m, 2H), 3.89 (s, 3H). <sup>13</sup>C NMR (400 MHz, Chloroform-*d*) δ(ppm): 159.2, 150.1, 148.5, 140.1, 134.5, 131.6, 131.1, 128.9, 128.5, 127.2, 126.9, 120.9, 113.9, 55.3. HRMS: *m/z*: calculated for C<sub>16</sub>H<sub>13</sub>NO: 235.0997; found: 236.1069 [M+H]<sup>+</sup>.

## 4-(quinolin-5-yl)benzoic acid (5-QBA)

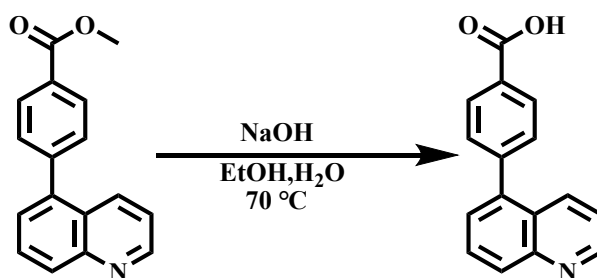

methyl 4-(quinolin-5-yl)benzoate (5mmol, 1.3100 g) were added into a 500.0 mL two-necked flask with 80.0 ml EtOH, NaOH(10 mmol, 0.4000 g) were dissolved in 20.0 mL water and these two solutions were mixed. After stirring at 70 °C for 12 h, the reaction mixture was diluted with water and adjust the pH to 4.0 with 1M HCl aqueous solution, then extracted with ethyl acetate. The organic layer was separated, washed with water and brine, dried with enough anhydrous sodium sulphate. After filtration, the filtrate was evaporated under reduced pressure and recrystallized with ethanol and water, obtaining 0.7450g colorless powder of 5-QBA with 60.0% yield. <sup>1</sup>H NMR (400 MHz, DMSO-*d*<sub>6</sub>) δ 12.95 (s, 1H), 8.93 (dd, *J* = 4.1, 1.8 Hz, 1H), 8.47 (dd, *J* = 8.3, 1.8 Hz, 1H), 8.07 (d, *J* = 2.6 Hz, 1H), 8.05 (d, *J* = 4.3 Hz, 2H), 7.83 (dd, *J* = 7.2, 1.5 Hz, 1H), 7.79 (d, *J* = 8.3 Hz, 2H), 7.75 – 7.70 (m, 1H), 7.60 (dd, *J* = 8.3, 4.1 Hz, 1H). <sup>13</sup>C NMR (400 MHz, DMSO-*d*<sub>6</sub>) δ 169.1, 150.9, 145.4, 144.1, 140.0, 137.9, 131.2, 130.7, 129.8, 129.1, 129.0, 128.8, 126.9, 122.0. HRMS: *m/z*: calculated for C<sub>16</sub>H<sub>11</sub>NO<sub>2</sub>: 249.0790; found: 248.0716 [M-H]<sup>-</sup>.



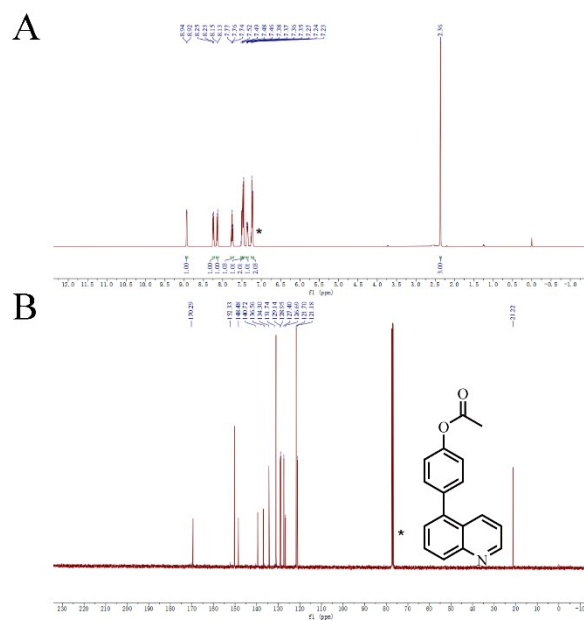

**Figure S3.** (A)  $^1\text{H}$  and (B)  $^{13}\text{C}$  NMR spectra of 5-QPA. The solvent peaks were marked as asterisk.

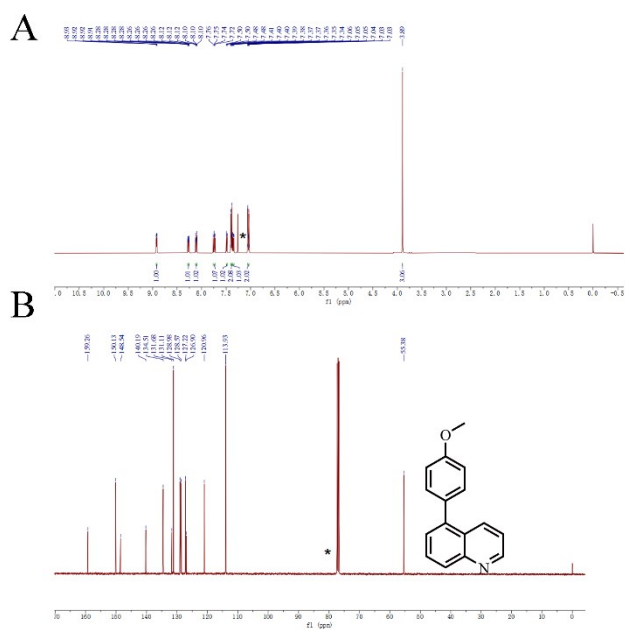

**Figure S4.** (A)  $^1\text{H}$  and (B)  $^{13}\text{C}$  NMR spectra of 5-MPQ. The solvent peaks were marked as asterisk.

## High Resolution Mass Spectrometry

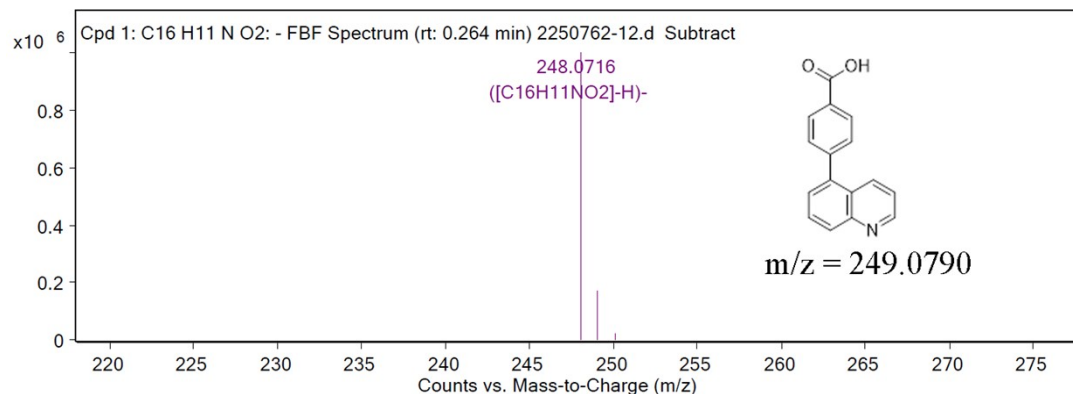

Figure S5. High resolution mass spectrum of 5-QBA with chemical ionization.

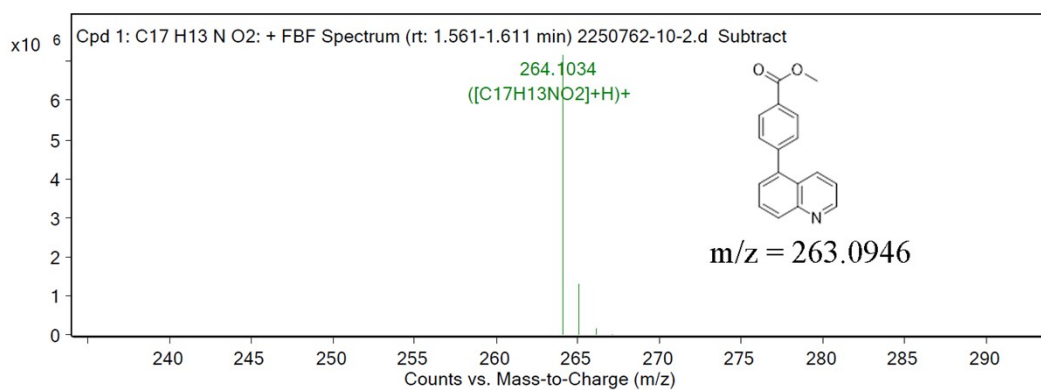

Figure S6. High resolution mass spectrum of 5-MQB with chemical ionization.

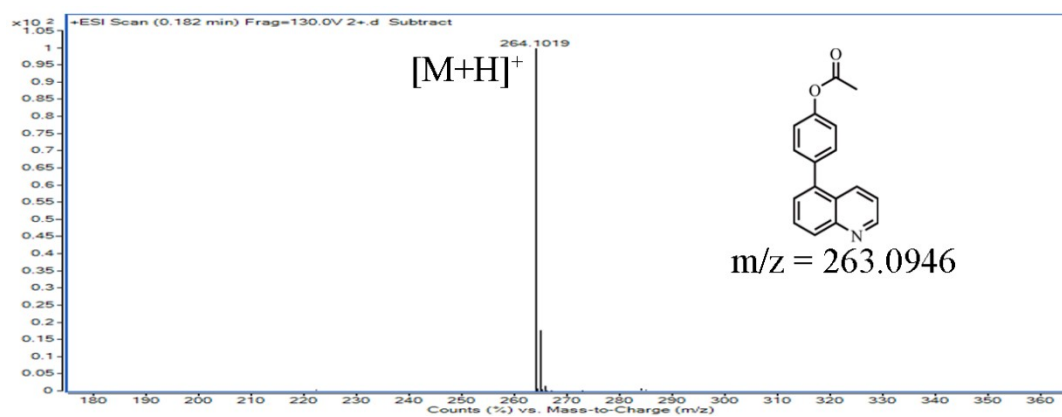

Figure S7. High resolution mass spectrum of 5-QPA with chemical ionization.

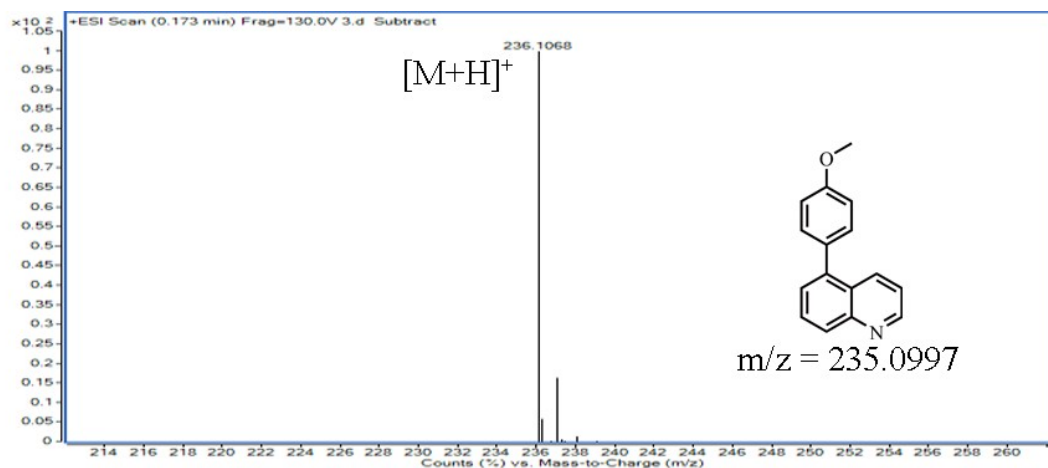

**Figure S8.** High resolution mass spectrum of 5-MPQ with chemical ionization.

## Size Distribution

**Table S1.** The size distribution of 5-QBA in the different solvent systems. Concentration =  $10^{-5}$  M.

|                            | particle size (nm) | Polydispersity |
|----------------------------|--------------------|----------------|
| $V_{H_2O} : V_{DMA} = 7:3$ | 116.3              | 0.031          |
| $V_{H_2O} : V_{DMA} = 8:2$ | 212.5              | 0.047          |
| $V_{H_2O} : V_{DMA} = 9:1$ | 513.8              | 0.055          |

**Table S2.** The size distribution of 5-MQB in the different solvent systems. Concentration =  $10^{-5}$  M.

|                            | particle size (nm) | Polydispersity |
|----------------------------|--------------------|----------------|
| $V_{H_2O} : V_{DMA} = 7:3$ | 156.1              | 0.055          |
| $V_{H_2O} : V_{DMA} = 8:2$ | 353.8              | 0.048          |
| $V_{H_2O} : V_{DMA} = 9:1$ | 656.7              | 0.086          |

**Table S3.** The size distribution of 5-QPA in the different solvent systems. Concentration =  $10^{-5}$  M.

|                            | particle size (nm) | Polydispersity |
|----------------------------|--------------------|----------------|
| $V_{H_2O} : V_{DMA} = 7:3$ | 353.4              | 0.018          |
| $V_{H_2O} : V_{DMA} = 8:2$ | 652.3              | 0.022          |
| $V_{H_2O} : V_{DMA} = 9:1$ | 956.6              | 0.046          |

**Table S4.** The size distribution of 5-MPQ in the different solvent systems. Concentration =  $10^{-5}$  M.

|                            | particle size (nm) | Polydispersity |
|----------------------------|--------------------|----------------|
| $V_{H_2O} : V_{DMA} = 7:3$ | 168.7              | 0.047          |
| $V_{H_2O} : V_{DMA} = 8:2$ | 353.4              | 0.066          |
| $V_{H_2O} : V_{DMA} = 9:1$ | 566.8              | 0.051          |



**Table S5.** The size distribution of 5-MQB with different concentrations  $\text{Fe}^{3+}$

| $\text{Fe}^{3+}$ concentrations ( $\mu\text{M}$ ) | particle size (nm) | Polydispersity |
|---------------------------------------------------|--------------------|----------------|
| 1.0                                               | 138.4              | 0.088          |
| 5.0                                               | 145.1              | 0.077          |
| 10.0                                              | 196.3              | 0.075          |
| 50.0                                              | 286.7              | 0.087          |
| 100.0                                             | 335.4              | 0.092          |
| 500.0                                             | 413.3              | 0.120          |

## Spectroscopic Data

### UV-vis Absorption Spectra

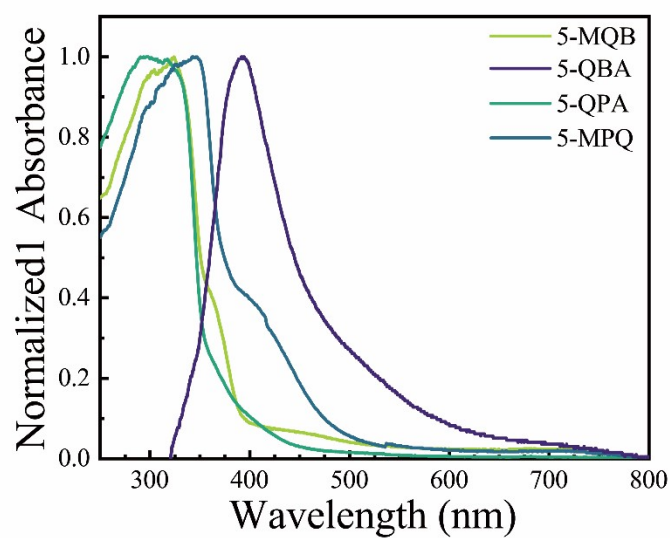

**Figure S9.** The solid-state UV-vis absorption spectra of 5-MQB, 5-QBA, 5-QPA and 5-MPQ.

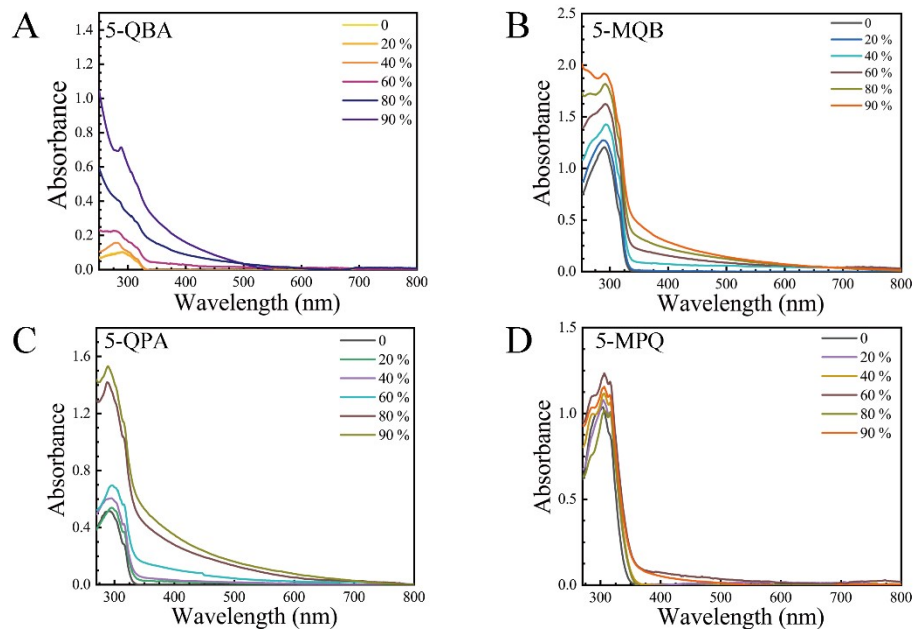

**Figure S10.** A-D The UV-vis absorption spectra of 5-MQB, 5-QBA, 5-QPA and 5-MPQ in different water fraction.

## Solid State Excitation and Emission Spectra

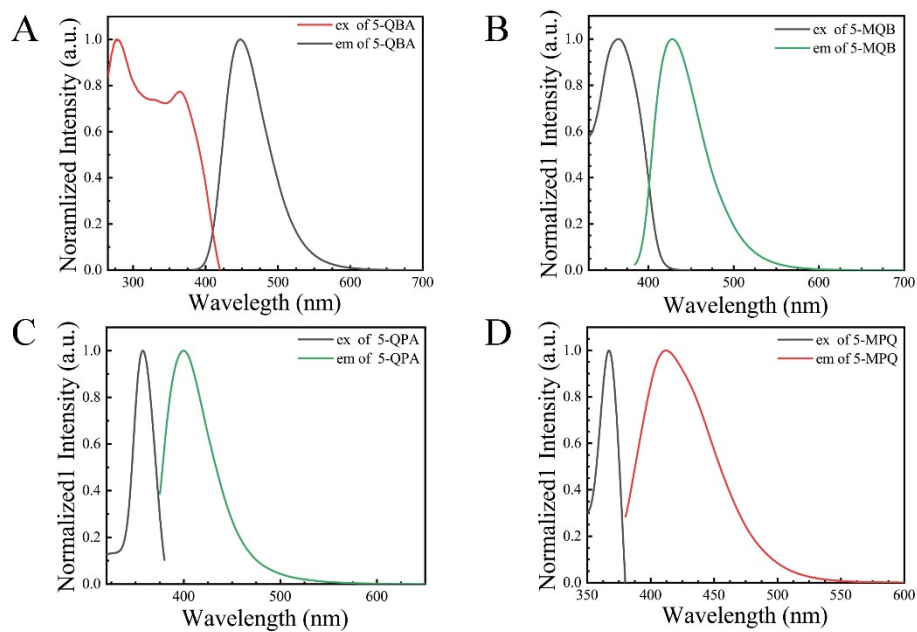

**Figure S11.** The solid-state excitation and emission wavelength of 5-MQB, 5-QBA, 5-QPA and 5-MPQ.

## Fluorescence Lifetime of Solid State.

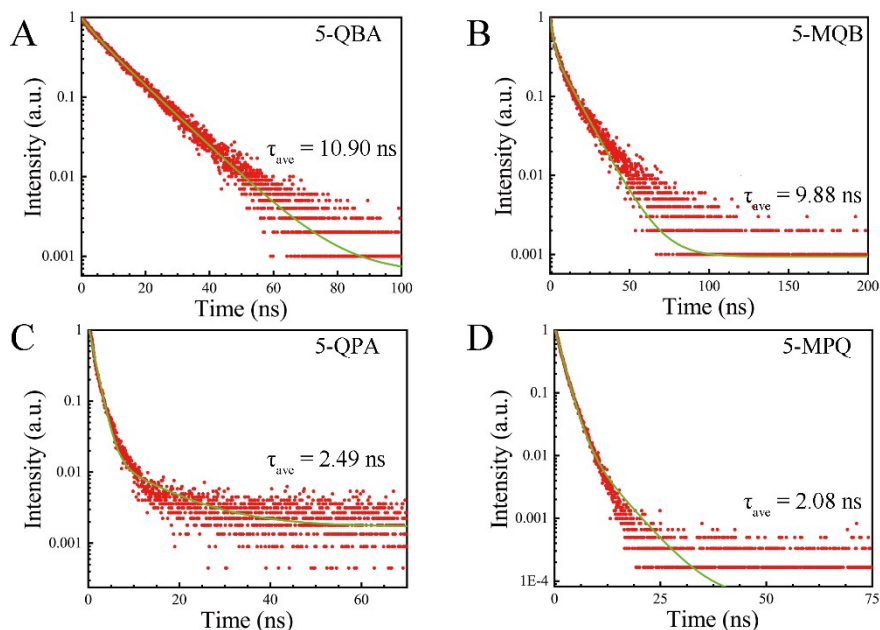

**Figure S12.** The solid-state fluorescence lifetime of 5-MQB, 5-QBA, 5-QPA and 5-MPQ.

## The Fluorescence Spectroscopy of Liquid State.

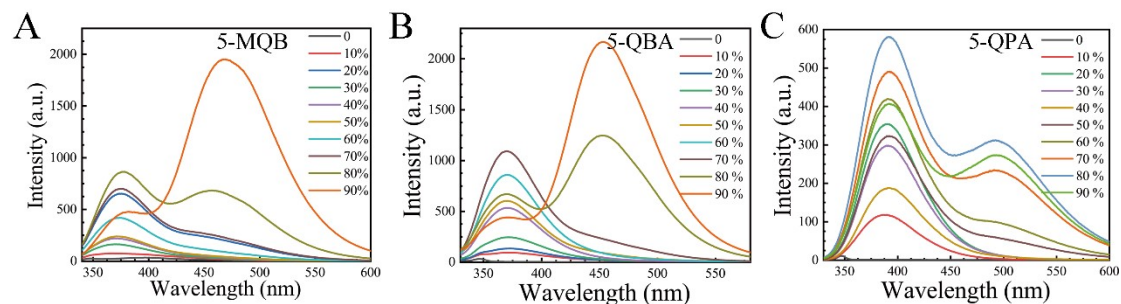

**Figure S13.** (A) PL spectra of 5-MQB in glycerol/DMA mixtures with different glycerol.  $c = 10^{-5}$  M,  $\lambda_{\text{ex}} = 316$  nm. (B) PL spectra of 5-QBA in glycerol/DMA mixtures with different glycerol.  $c = 10^{-5}$  M,  $\lambda_{\text{ex}} = 315$  nm. (C) PL spectra of 5-QPA in glycerol/DMA mixtures with different glycerol.  $c = 10^{-5}$  M,  $\lambda_{\text{ex}} = 315$  nm.

## Fluorescence Lifetime and Quantum Yield of Liquid State.

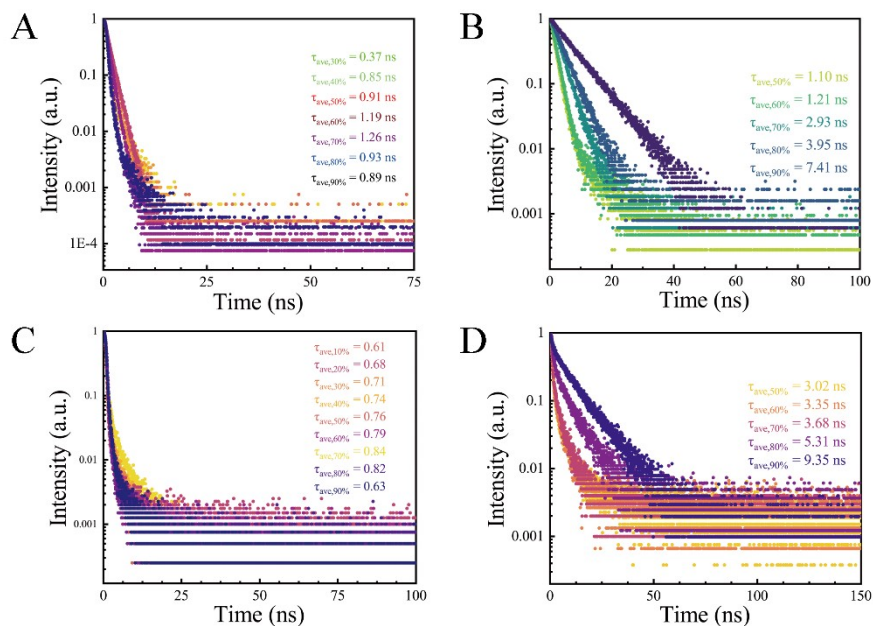

**Figure S14.** (A) The lifetime of 5-QBA at 375 nm in different water fraction. (B) The lifetime of 5-QBA at 470 nm in different water fraction. (C) The lifetime of 5-QBA at 375 nm in different glycerol fraction. (D) The lifetime of 5-QBA at 470 nm in different glycerol fraction.

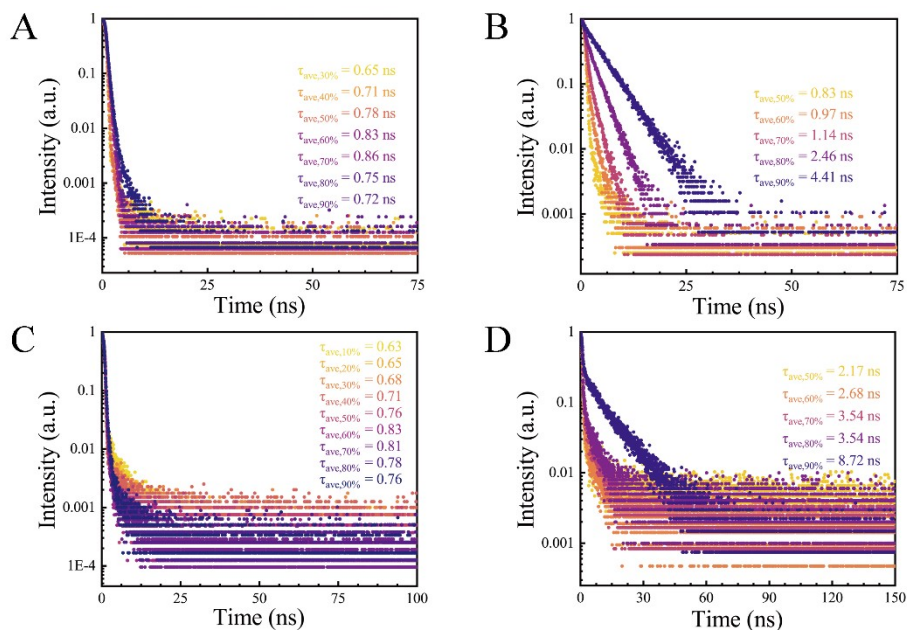

**Figure S15.** (A) The lifetime of 5-MQB at 365 nm in different water fraction. (B) The lifetime of 5-MQB at 457 nm in different water fraction. (C) The lifetime of 5-MQB at 365 nm in different glycerol fraction. (D) The lifetime of 5-MQB at 457 nm in different glycerol fraction.

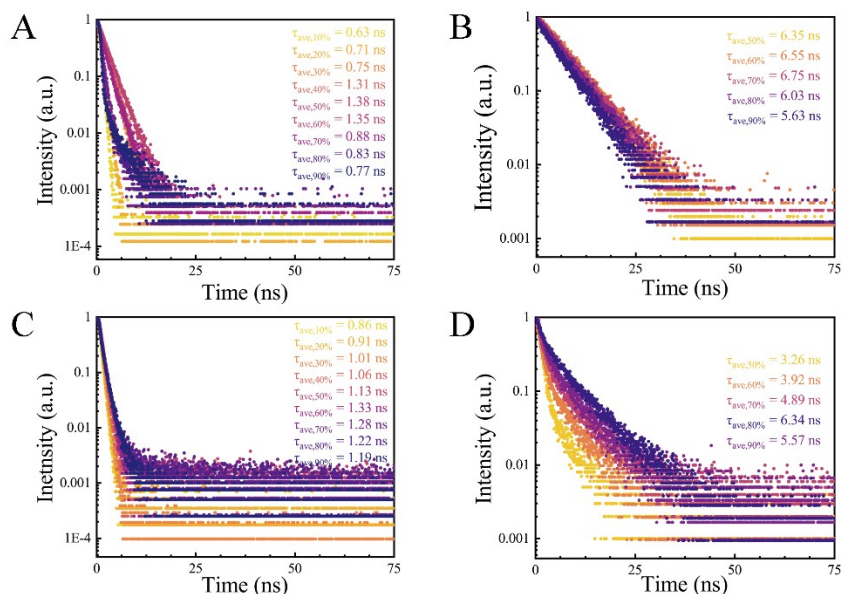

**Figure S16.** (A) The lifetime of 5-QPA at 385 nm in different water fraction. (B) The lifetime of 5-QPA at 500 nm in different water fraction. (C) The lifetime of 5-QBA at 385 nm in different glycerol fraction. (D) The lifetime of 5-QPA at 500 nm in different glycerol fraction.

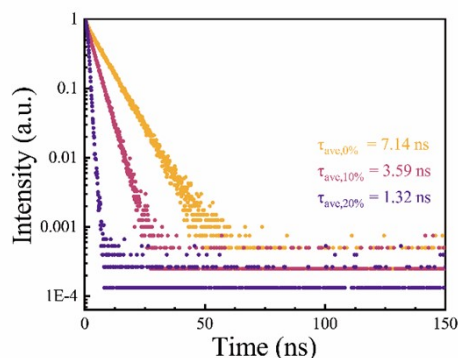

**Figure S17.** The lifetime of 5-MPQ at 410 nm in different water fraction

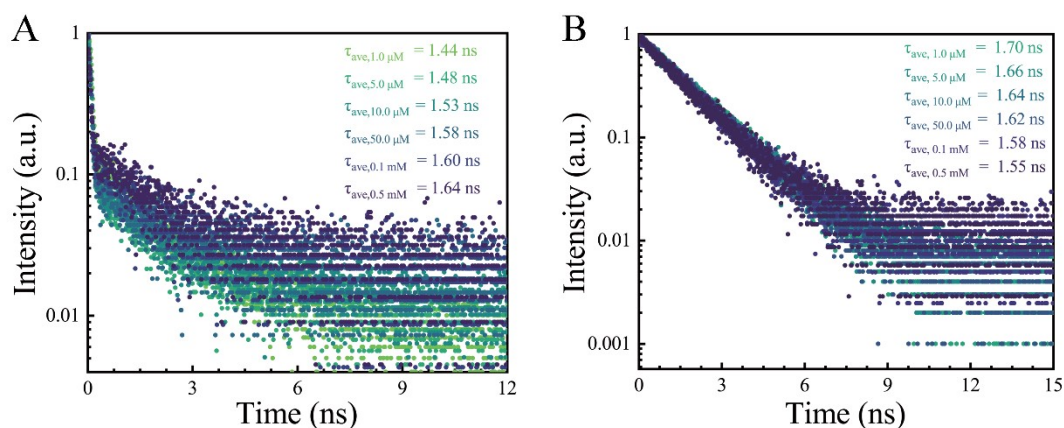

**Figure S18.** (A) The lifetime of 5-MQB at 375 nm with different concentrations of  $Fe^{3+}$ . (B) The lifetime of 5-MQB at 457 nm with different concentrations of  $Fe^{3+}$ .

**Table S6.** The photophysical parameters of 5- QBA in different water fraction.  $\Phi_f$  = fluorescence quantum yield,  $k_r$  = radiative decay rate constant =  $\Phi_f / \tau_f$ ,  $k_{nr}$  = nonradiative decay rate constant =  $(1 - \Phi_f) / \tau_f$ , where  $\tau_f$  = fluorescence lifetime.

|                                                      | $\tau_f$ (ns) |        | $\Phi_f$ (%) |        | $k_r$ ( $\times 10^6$ s $^{-1}$ ) |        | $k_{nr}$ ( $\times 10^6$ s $^{-1}$ ) |        |
|------------------------------------------------------|---------------|--------|--------------|--------|-----------------------------------|--------|--------------------------------------|--------|
|                                                      | 375 nm        | 470 nm | 375 nm       | 470 nm | 375 nm                            | 470 nm | 375 nm                               | 470 nm |
| V <sub>H<sub>2</sub>O</sub> : V <sub>DMA</sub> = 3:7 | 0.37          | -      | 0.9          | -      | 24.3                              | -      | 2678.4                               | -      |
| V <sub>H<sub>2</sub>O</sub> : V <sub>DMA</sub> = 4:6 | 0.85          | -      | 1.4          | -      | 16.5                              | -      | 1160                                 | -      |
| V <sub>H<sub>2</sub>O</sub> : V <sub>DMA</sub> = 5:5 | 0.91          | 1.10   | 1.6          | 3.2    | 17.5                              | 29.1   | 1081.3                               | 880    |
| V <sub>H<sub>2</sub>O</sub> : V <sub>DMA</sub> = 6:4 | 1.19          | 1.21   | 3.2          | 4.3    | 26.9                              | 35.5   | 813.4                                | 790.9  |
| V <sub>H<sub>2</sub>O</sub> : V <sub>DMA</sub> = 7:3 | 1.23          | 2.93   | 3.6          | 5.6    | 29.3                              | 19.11  | 783.7                                | 322.18 |
| V <sub>H<sub>2</sub>O</sub> : V <sub>DMA</sub> = 8:2 | 0.93          | 3.95   | 4.3          | 18.8   | 46.2                              | 47.59  | 1029                                 | 205.6  |
| V <sub>H<sub>2</sub>O</sub> : V <sub>DMA</sub> = 9:1 | 0.89          | 7.41   | 2.9          | 68.8   | 32.5                              | 92.8   | 1091                                 | 42.1   |

**Table S7.** The photophysical parameters of 5- QBA in different glycerol fraction.

|                                           | $\tau_f$ (ns) |        | $\Phi_f$ (%) |        | $k_r$ ( $\times 10^6$ s $^{-1}$ ) |        | $k_{nr}$ ( $\times 10^6$ s $^{-1}$ ) |        |
|-------------------------------------------|---------------|--------|--------------|--------|-----------------------------------|--------|--------------------------------------|--------|
|                                           | 365 nm        | 470 nm | 365 nm       | 470 nm | 365 nm                            | 470 nm | 365 nm                               | 470 nm |
| V <sub>gly</sub> : V <sub>DMA</sub> = 1:9 | 0.61          | -      | 1.1          | -      | 18.0                              | -      | 1621.3                               | -      |
| V <sub>gly</sub> : V <sub>DMA</sub> = 2:8 | 0.68          | -      | 1.6          | -      | 23.5                              | -      | 1447.1                               | -      |
| V <sub>gly</sub> : V <sub>DMA</sub> = 3:7 | 0.71          | -      | 2.3          | -      | 32.4                              | -      | 1376.1                               | -      |
| V <sub>gly</sub> : V <sub>DMA</sub> = 4:6 | 0.74          | -      | 4.2          | -      | 56.7                              | -      | 1294.6                               | -      |
| V <sub>gly</sub> : V <sub>DMA</sub> = 5:5 | 0.76          | 3.02   | 4.9          | 0.9    | 64.5                              | 2.9    | 1251.3                               | 328.2  |
| V <sub>gly</sub> : V <sub>DMA</sub> = 6:4 | 0.79          | 3.35   | 5.1          | 1.1    | 64.5                              | 3.3    | 1201.3                               | 295.2  |
| V <sub>gly</sub> : V <sub>DMA</sub> = 7:3 | 0.84          | 3.68   | 7.9          | 7.7    | 94.0                              | 20.9   | 1096.4                               | 250.9  |
| V <sub>gly</sub> : V <sub>DMA</sub> = 8:2 | 0.82          | 5.31   | 9.2          | 27.4   | 112.2                             | 51.6   | 1107.3                               | 136.7  |
| V <sub>gly</sub> : V <sub>DMA</sub> = 9:1 | 0.63          | 9.35   | 6.3          | 70.3   | 100.0                             | 75.1   | 1487.3                               | 31.7   |

**Table S8.** The photophysical parameters of 5- MQB in different water fraction.

|                                                      | $\tau_f$ (ns) |        | $\Phi_f$ (%) |        | $k_r$ ( $\times 10^6$ s $^{-1}$ ) |        | $k_{nr}$ ( $\times 10^6$ s $^{-1}$ ) |        |
|------------------------------------------------------|---------------|--------|--------------|--------|-----------------------------------|--------|--------------------------------------|--------|
|                                                      | 365 nm        | 457 nm | 365 nm       | 457 nm | 365 nm                            | 457 nm | 365 nm                               | 457 nm |
| V <sub>H<sub>2</sub>O</sub> : V <sub>DMA</sub> = 3:7 | 0.65          | -      | 1.3          | -      | 20.0                              | -      | 1518.5                               | -      |
| V <sub>H<sub>2</sub>O</sub> : V <sub>DMA</sub> = 4:6 | 0.71          | -      | 2.8          | -      | 39.4                              | -      | 1369.0                               | -      |
| V <sub>H<sub>2</sub>O</sub> : V <sub>DMA</sub> = 5:5 | 0.78          | 0.83   | 3.2          | 3.5    | 41.0                              | 42.1   | 1241.0                               | 1162.7 |
| V <sub>H<sub>2</sub>O</sub> : V <sub>DMA</sub> = 6:4 | 0.83          | 0.97   | 5.5          | 6.8    | 66.2                              | 70.1   | 1138.6                               | 960.8  |
| V <sub>H<sub>2</sub>O</sub> : V <sub>DMA</sub> = 7:3 | 0.86          | 1.14   | 6.4          | 9.8    | 74.4                              | 85.9   | 1088.4                               | 791.2  |
| V <sub>H<sub>2</sub>O</sub> : V <sub>DMA</sub> = 8:2 | 0.75          | 2.46   | 8.1          | 43.2   | 108.0                             | 175.6  | 1125.3                               | 230.8  |
| V <sub>H<sub>2</sub>O</sub> : V <sub>DMA</sub> = 9:1 | 0.72          | 4.41   | 4.2          | 53.0   | 58.3                              | 132.2  | 1330.6                               | 94.6   |

**Table S9.** The photophysical parameters of 5- MQB in different glycerol fraction.

|                                           | $\tau_f$ (ns) |        | $\Phi_f$ (%) |        | $k_r$ ( $\times 10^6$ s $^{-1}$ ) |        | $k_{nr}$ ( $\times 10^6$ s $^{-1}$ ) |        |
|-------------------------------------------|---------------|--------|--------------|--------|-----------------------------------|--------|--------------------------------------|--------|
|                                           | 365 nm        | 457 nm | 365 nm       | 457 nm | 365 nm                            | 457 nm | 365 nm                               | 457 nm |
| V <sub>gly</sub> : V <sub>DMA</sub> = 1:9 | 0.63          | -      | 0.5          | -      | 7.9                               | -      | 1579.4                               | -      |
| V <sub>gly</sub> : V <sub>DMA</sub> = 2:8 | 0.65          | -      | 0.6          | -      | 9.23                              | -      | 1529.2                               | -      |
| V <sub>gly</sub> : V <sub>DMA</sub> = 3:7 | 0.68          | -      | 0.9          | -      | 13.23                             | -      | 1457.4                               | -      |
| V <sub>gly</sub> : V <sub>DMA</sub> = 4:6 | 0.71          | -      | 1.2          | -      | 16.9                              | -      | 1391.5                               | -      |
| V <sub>gly</sub> : V <sub>DMA</sub> = 5:5 | 0.76          | 2.17   | 3.5          | 2.3    | 46.1                              | 10.6   | 1269.7                               | 450.2  |
| V <sub>gly</sub> : V <sub>DMA</sub> = 6:4 | 0.83          | 2.68   | 4.4          | 5.5    | 53.1                              | 20.5   | 1151.8                               | 352.6  |
| V <sub>gly</sub> : V <sub>DMA</sub> = 7:3 | 0.81          | 3.54   | 4.8          | 6.2    | 59.3                              | 17.5   | 1175.3                               | 264.9  |
| V <sub>gly</sub> : V <sub>DMA</sub> = 8:2 | 0.78          | 3.54   | 5.6          | 15.4   | 71.8                              | 15.8   | 1210.3                               | 266.7  |
| V <sub>gly</sub> : V <sub>DMA</sub> = 9:1 | 0.76          | 8.72   | 3.9          | 60.3   | 114.7                             | 69.2   | 1201.1                               | 45.5   |

**Table S10.** The photophysical parameters of 5- QPA in different water fraction.

|                                                      | $\tau_f$ (ns) |        | $\Phi_f$ (%) |        | $k_r$ ( $\times 10^6$ s $^{-1}$ ) |        | $k_{nr}$ ( $\times 10^6$ s $^{-1}$ ) |        |
|------------------------------------------------------|---------------|--------|--------------|--------|-----------------------------------|--------|--------------------------------------|--------|
|                                                      | 385 nm        | 500 nm | 385 nm       | 500 nm | 385 nm                            | 500 nm | 385 nm                               | 500 nm |
| V <sub>H<sub>2</sub>O</sub> : V <sub>DMA</sub> = 1:9 | 0.63          | -      | 1.3          | -      | 20.6                              | -      | 1566.7                               | -      |
| V <sub>H<sub>2</sub>O</sub> : V <sub>DMA</sub> = 2:8 | 0.71          | -      | 1.9          | -      | 26.7                              | -      | 1381.7                               | -      |
| V <sub>H<sub>2</sub>O</sub> : V <sub>DMA</sub> = 3:7 | 0.75          | -      | 2.1          | -      | 28                                | -      | 1305.3                               | -      |
| V <sub>H<sub>2</sub>O</sub> : V <sub>DMA</sub> = 4:6 | 1.31          | -      | 2.7          | -      | 20.6                              | -      | 742.7                                | -      |
| V <sub>H<sub>2</sub>O</sub> : V <sub>DMA</sub> = 5:5 | 1.38          | 6.35   | 3.2          | 0.9    | 23.2                              | 1.4    | 701.4                                | 156.1  |
| V <sub>H<sub>2</sub>O</sub> : V <sub>DMA</sub> = 6:4 | 1.35          | 6.55   | 4.5          | 1.5    | 33.3                              | 2.3    | 707.4                                | 150.4  |
| V <sub>H<sub>2</sub>O</sub> : V <sub>DMA</sub> = 7:3 | 0.88          | 6.75   | 3.9          | 2.5    | 44.3                              | 3.7    | 1092.1                               | 144.4  |
| V <sub>H<sub>2</sub>O</sub> : V <sub>DMA</sub> = 8:2 | 0.83          | 6.03   | 2.5          | 2.7    | 30.1                              | 4.5    | 1174.7                               | 161.4  |
| V <sub>H<sub>2</sub>O</sub> : V <sub>DMA</sub> = 9:1 | 0.77          | 5.36   | 0.9          | 2.1    | 11.7                              | 3.9    | 1287.1                               | 182.6  |

**Table S11.** The photophysical parameters of 5- QPA in different glycerol fraction.

|                                           | $\tau_f$ (ns) |        | $\Phi_f$ (%) |        | $k_r$ ( $\times 10^6$ s $^{-1}$ ) |        | $k_{nr}$ ( $\times 10^6$ s $^{-1}$ ) |        |
|-------------------------------------------|---------------|--------|--------------|--------|-----------------------------------|--------|--------------------------------------|--------|
|                                           | 385 nm        | 500 nm | 385 nm       | 500 nm | 385 nm                            | 500 nm | 385 nm                               | 500 nm |
| V <sub>gly</sub> : V <sub>DMA</sub> = 1:9 | 0.86          | -      | 2.5          | -      | 29.1                              | -      | 1133.7                               | -      |
| V <sub>gly</sub> : V <sub>DMA</sub> = 2:8 | 0.91          | -      | 3.2          | -      | 35.2                              | -      | 1063.7                               | -      |
| V <sub>gly</sub> : V <sub>DMA</sub> = 3:7 | 1.01          | -      | 3.7          | -      | 36.6                              | -      | 953.5                                | -      |
| V <sub>gly</sub> : V <sub>DMA</sub> = 4:6 | 1.06          | -      | 4.2          | -      | 39.7                              | -      | 903.8                                | -      |
| V <sub>gly</sub> : V <sub>DMA</sub> = 5:5 | 1.13          | 3.26   | 4.5          | 2.1    | 39.8                              | 6.4    | 845.1                                | 300.3  |
| V <sub>gly</sub> : V <sub>DMA</sub> = 6:4 | 1.33          | 3.92   | 5.2          | 2.9    | 39.1                              | 7.4    | 712.8                                | 247.7  |
| V <sub>gly</sub> : V <sub>DMA</sub> = 7:3 | 1.28          | 4.89   | 5.9          | 3.7    | 46.1                              | 7.6    | 735.9                                | 196.9  |
| V <sub>gly</sub> : V <sub>DMA</sub> = 8:2 | 1.22          | 6.34   | 6.8          | 4.1    | 55.7                              | 6.5    | 763.9                                | 151.3  |
| V <sub>gly</sub> : V <sub>DMA</sub> = 9:1 | 1.19          | 5.57   | 5.5          | 3.4    | 46.2                              | 6.1    | 794.1                                | 173.4  |

**Table S12.** The photophysical parameters of 5-MPQ in different glycerol fraction.

|                                                 | $\tau_f$ (ns) | $\Phi_f$ (%) | $k_r (\times 10^6 \text{ s}^{-1})$ | $k_{nr} (\times 10^6 \text{ s}^{-1})$ |
|-------------------------------------------------|---------------|--------------|------------------------------------|---------------------------------------|
| $V_{\text{H}_2\text{O}} : V_{\text{DMA}} = 0$   | 7.14          | 10.3         | 14.2                               | 125.6                                 |
| $V_{\text{H}_2\text{O}} : V_{\text{DMA}} = 1:9$ | 3.59          | 17.6         | 49.1                               | 229.5                                 |
| $V_{\text{H}_2\text{O}} : V_{\text{DMA}} = 2:8$ | 1.32          | 6.7          | 50.8                               | 706.8                                 |

**Table S13. Detection of  $\text{Fe}^{3+}$  in Green Lake Water Samples**

| added ( $\mu\text{M}$ ) | found ( $\mu\text{M}$ ) | recovery (%) | RSD (% , n = 3) |
|-------------------------|-------------------------|--------------|-----------------|
| 0                       | 3.42                    | 0            | 1.6             |
| 5                       | 8.335                   | 98.30        | 2.1             |
| 15                      | 18.517                  | 100.64       | 2.7             |
| 30                      | 33.159                  | 99.13        | 3.2             |

**Table S14.** The photophysical parameters of 5- MQB with different concentrations of  $\text{Fe}^{3+}$ .

| $\text{Fe}^{3+}$ concentrations<br>( $\mu\text{M}$ ) | $\tau_f$ (ns) |        | $\Phi_f$ (%) |        | $k_r (\times 10^6 \text{ s}^{-1})$ |        | $k_{nr} (\times 10^6 \text{ s}^{-1})$ |        |
|------------------------------------------------------|---------------|--------|--------------|--------|------------------------------------|--------|---------------------------------------|--------|
|                                                      | 365 nm        | 457 nm | 365 nm       | 457 nm | 365 nm                             | 457 nm | 365 nm                                | 457 nm |
| 1.0                                                  | 1.44          | 1.70   | 7.3          | 35.8   | 50.7                               | 210.6  | 643.8                                 | 377.6  |
| 5.0                                                  | 1.48          | 1.66   | 6.6          | 42.2   | 44.6                               | 254.2  | 631.1                                 | 348.2  |
| 10.0                                                 | 1.53          | 1.64   | 4.2          | 53.1   | 27.5                               | 323.8  | 626.1                                 | 285.9  |
| 50.0                                                 | 1.58          | 1.62   | 3.1          | 59.4   | 19.6                               | 366.7  | 613.3                                 | 250.6  |
| 100.0                                                | 1.60          | 1.58   | 2.4          | 62.3   | 15.0                               | 394.3  | 610.2                                 | 238.6  |
| 500.0                                                | 1.64          | 1.55   | 1.9          | 66.9   | 11.6                               | 431.6  | 598.2                                 | 213.5  |

## Other Spectroscopic Data

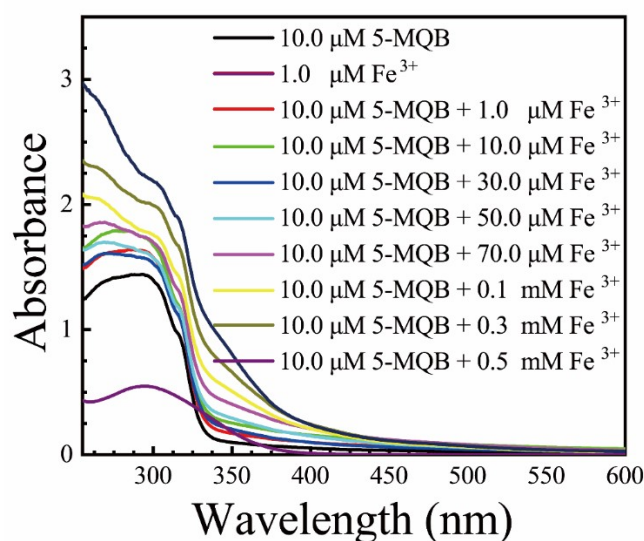**Figure S19.** The UV-vis absorption spectra of 5-MQB with different concentrations of  $\text{Fe}^{3+}$ .



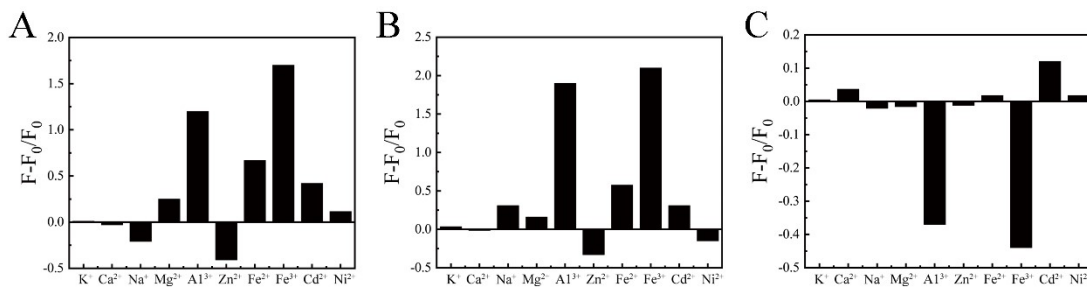

**Figure S20.** (A) Response selectivity of the 5-QBA to different metal ions, (B) Response selectivity of the 5-QPA to different metal ions, (C) Response selectivity of the 5-MPQ to different metal ions.

## XPS Data:

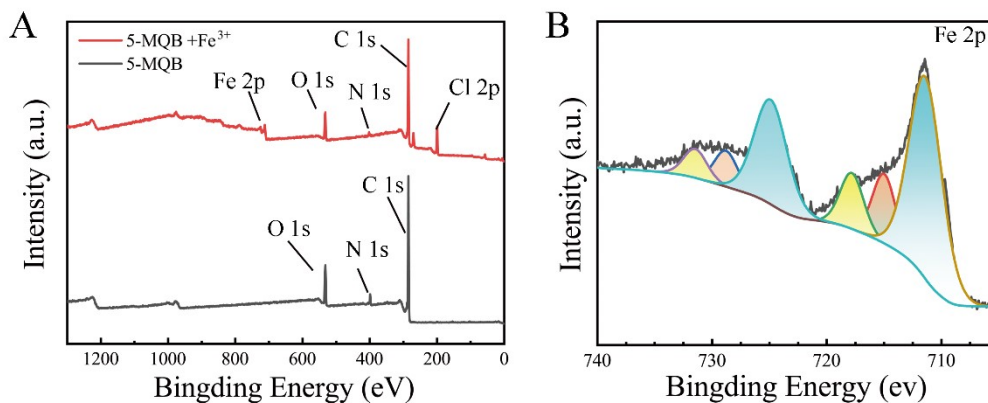

**Figure S21.** (A) XPS survey spectra of 5-MQB and 5-MQB with  $\text{Fe}^{3+}$ . (B) Fe 2p core-level XPS spectra of 5-MQB with  $\text{Fe}^{3+}$ .

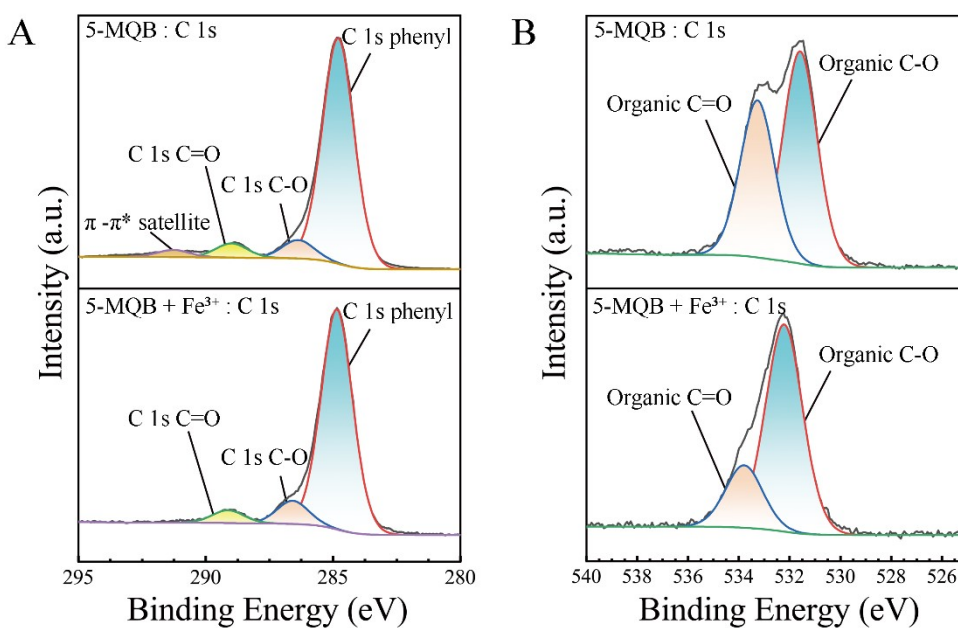

**Figure S22.** C 1s (A) and N 1s (B) core-level XPS spectra of 5-MQB and 5-MQB with

Fe<sup>3+</sup>.

## The Crystal Structure of Compounds.

**Table S15.** Summary of crystallographic data and structural refinements

| Compound                                                                   | 5-MQB                                           | 5-QBA                                           | 5-QPA                                           | 5-MPQ                              |
|----------------------------------------------------------------------------|-------------------------------------------------|-------------------------------------------------|-------------------------------------------------|------------------------------------|
| CCDC number                                                                | 2255887                                         | 2255888                                         | 2255889                                         | 2255886                            |
| Empirical formula                                                          | C <sub>17</sub> H <sub>13</sub> NO <sub>2</sub> | C <sub>16</sub> H <sub>11</sub> NO <sub>2</sub> | C <sub>17</sub> H <sub>13</sub> NO <sub>2</sub> | C <sub>16</sub> H <sub>13</sub> NO |
| Formula weight                                                             | 263.28                                          | 249.26                                          | 263.28                                          | 235.27                             |
| Temperature/K                                                              | 300.98(10)                                      | 296.15                                          | 293(2)                                          | 235.27                             |
| Crystal system                                                             | monoclinic                                      | monoclinic                                      | monoclinic                                      | monoclinic                         |
| Space group                                                                | P2 <sub>1</sub>                                 | P2 <sub>1</sub> /c                              | P2 <sub>1</sub> /n                              | P2 <sub>1</sub> /c                 |
| <i>a</i> /Å                                                                | 11.1492(12)                                     | 10.278(2)                                       | 9.7854(5)                                       | 7.6245(11)                         |
| <i>b</i> /Å                                                                | 4.0685(4)                                       | 7.3347(16)                                      | 10.5351(4)                                      | 7.2463(10)                         |
| <i>c</i> /Å                                                                | 14.1566(17)                                     | 15.573(5)                                       | 13.0707(6)                                      | 21.937(3)                          |
| $\alpha$ /°                                                                | 90                                              | 90                                              | 90                                              | 90                                 |
| $\beta$ /°                                                                 | 95.372(10)                                      | 97.695(11)                                      | 107.184(5)                                      | 93.996(8)                          |
| $\gamma$ /°                                                                | 90                                              | 90                                              | 90                                              | 90                                 |
| Volume/Å <sup>3</sup>                                                      | 639.33(12)                                      | 1163.4(5)                                       | 1287.31(11)                                     | 1209.0(3)                          |
| <i>Z</i>                                                                   | 2                                               | 4                                               | 4                                               | 4                                  |
| Density/ g.cm <sup>-3</sup>                                                | 1.368                                           | 1163.4(5)                                       | 1.358                                           | 1.293                              |
| F (000)                                                                    | 276.0                                           | 520.0                                           | 552.0                                           | 496.0                              |
| $\mu$ /mm <sup>-1</sup>                                                    | 0.090                                           | 0.095                                           | 0.090                                           | 0.409                              |
| Goodness-of-fit<br>on F <sup>2</sup>                                       | 1.145                                           | 1.060                                           | 1.116                                           | 0.981                              |
| <i>R</i> <sub>I</sub> [ <i>I</i> >= 2 $\sigma$ ( <i>I</i> )] <sup>b</sup>  | 0.0965                                          | 0.0685                                          | 1.116                                           | 0.0447                             |
| <i>wR</i> <sub>2</sub> [ <i>I</i> >= 2 $\sigma$ ( <i>I</i> )] <sup>c</sup> | 0.2505                                          | 0.1752                                          | 0.2419                                          | 0.1317                             |
| <i>R</i> <sub>I</sub> [all data] <sup>b</sup>                              | 0.1348                                          | 0.0870                                          | 0.1233                                          | 0.0610                             |
| <i>wR</i> <sub>2</sub> [all data] <sup>c</sup>                             | 0.2698                                          | 0.1947                                          | 0.2565                                          | 0.0610                             |

# Calculation

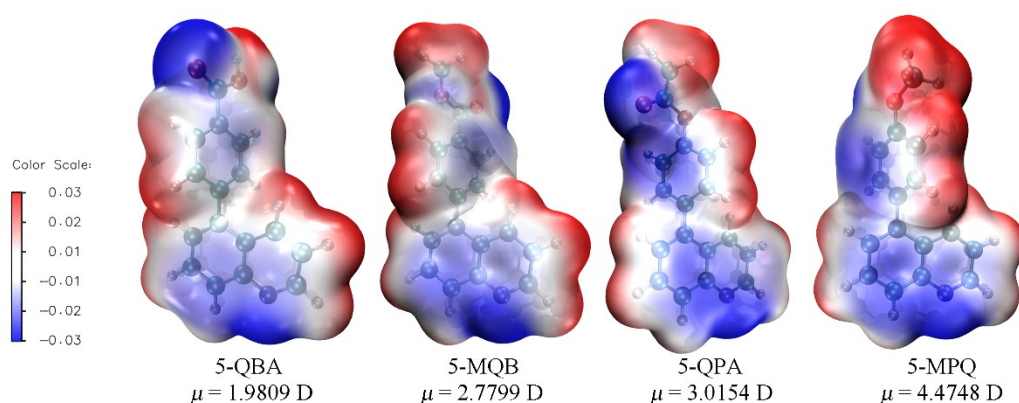

**Figure S23.** The ESP maps and dipole moment of compounds.

**Table S16.** Calculated C–C Atomic Distances and dihedral angles of compounds and their derivatives in the ground ( $S_0$ ) and excited states ( $S_1$ ) based on isolated phase, calculated by the TD-DFT, PBE0/Def2-SVP level, gaussian 09 program.

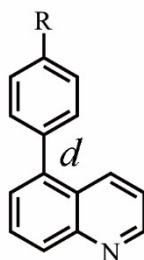

| compound | State | Atomic Distance (Å) $d$ | Dihedral Angle ( $^\circ$ ) $P_1$ and $P_2$ |
|----------|-------|-------------------------|---------------------------------------------|
| 5-MQB    | $S_0$ | 1.48472                 | 52.40994                                    |
|          | $S_1$ | 1.42851                 | 25.22277                                    |
| 5-QBA    | $S_0$ | 1.48456                 | 52.43515                                    |
|          | $S_1$ | 1.42886                 | 25.36345                                    |
| 5-QPA    | $S_0$ | 1.48526                 | 52.63170                                    |
|          | $S_1$ | 1.43619                 | 26.93252                                    |
| 5-MPQ    | $S_0$ | 1.48413                 | 51.40477                                    |
|          | $S_1$ | 1.44340                 | 30.00669                                    |

**Table S17.** Calculated C–C Atomic Distances and dihedral angles of compounds and their derivatives in the ground ( $S_0$ ) and excited states ( $S_1$ ) based on isolated phase, calculated by the ONION model, the QM part used PBE0/def2svp level, the MM part used UFF in gaussian 09 program.

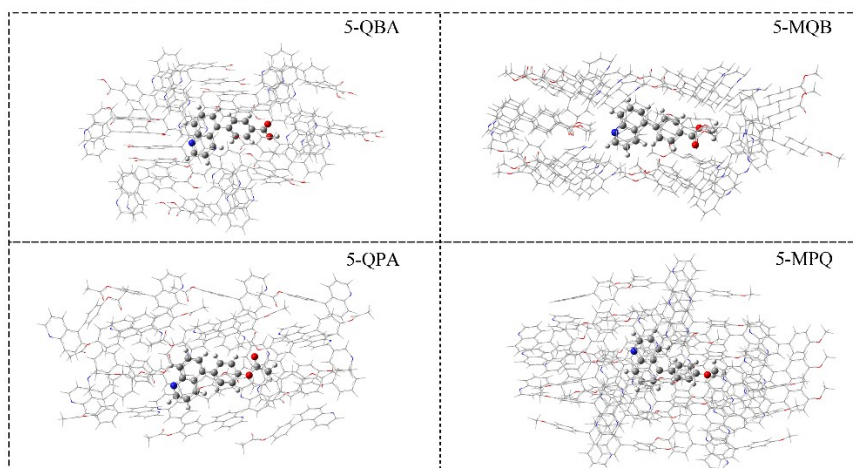

| compound | State | Atomic Distance<br>(Å) $d$ | Dihedral Angle ( $^\circ$ ) $P_1$<br>and $P_2$ | RMSD<br>$S_0$ Vs $S_1$ |
|----------|-------|----------------------------|------------------------------------------------|------------------------|
| 5-QBA    | $S_0$ | 1.48134                    | 60.33128                                       | 0.065                  |
|          | $S_1$ | 1.47570                    | 57.03277                                       |                        |
| 5-MQB    | $S_0$ | 1.48429                    | 46.96033                                       | 0.2721                 |
|          | $S_1$ | 1.47439                    | 44.05341                                       |                        |
| 5-QPA    | $S_0$ | 1.48166                    | 46.04247                                       | 0.1953                 |
|          | $S_1$ | 1.44584                    | 39.99062                                       |                        |
| 5-MPQ    | $S_0$ | 1.47993                    | 47.04038                                       | 0.1260                 |
|          | $S_1$ | 1.44924                    | 38.75792                                       |                        |

## References

1. Gaussian 09, Revision E.01 M. J. Frisch, G. W. Trucks, H. B. Schlegel, G. E. Scuseria, M. A. Robb, J. R. Cheeseman, G. Scalmani, V. Barone, B. Mennucci, G. A. Petersson, H. Nakatsuji, M. Caricato, X. Li, H. P. Hratchian, A. F. Izmaylov, J. Bloino, G. Zheng, J. L. Sonnenberg, M. Hada, M. Ehara, K. Toyota, R. Fukuda, J. Hasegawa, M. Ishida, T. Nakajima, Y. Honda, O. Kitao, H. Nakai, T. Vreven, J. A. Montgomery, Jr., J. E. Peralta, F. Ogliaro, M. Bearpark, J. J. Heyd, E. Brothers, K. N. Kudin, V. N. Staroverov, T. Keith, R. Kobayashi, J. Normand, K. Raghavachari, A. Rendell, J. C. Burant, S. S. Iyengar, J. Tomasi, M. Cossi, N. Rega, J. M. Millam, M. Klene, J. E. Knox, J. B. Cross, V. Bakken, C. Adamo, J. Jaramillo, R. Gomperts, R. E. Stratmann, O. Yazyev, A. J. Austin, R. Cammi, C. Pomelli, J. W. Ochterski, R. L. Martin,

K. Morokuma, V. G. Zakrzewski, G. A. Voth, P. Salvador, J. J. Dannenberg, S. Dapprich, A. D. Daniels, O. Farkas, J. B. Foresman, J. V. Ortiz, J. Cioslowski, and D. J. Fox, Gaussian, Inc., Wallingford CT, 2013.

2. J. R. Reimers. *J. Chem. Phys.*, 2001, **115**, 9103-9109.
3. T. Lu and F. Chen. *J Comput. Chem.*, 2012, **33**, 580-592.
4. P. R. Spackman, M. J. Turner, J. J. Mckinnon, S. K. Wolff, D. J. Grimwood, D. Jayatilaka and M. A. Spackman. *J Appl. Crystallogr.*, 2021, **54**, 1006-1011.
5. Dolomanov, O.V.; Bourhis, L.J.; Gildea, R.J.; Howard, J.A.K.; Puschmann, H., OLEX2: A complete structure solution, refinement and analysis program. *J. Appl. Cryst.*, 2009, **42**, 339-341
